# Supplementary material for: Inter- and Intra-Host Nucleotide Variations in Hepatitis A Virus in Culture and Clinical Samples Detected by Next-Generation Sequencing<strong> </strong>
Source: Preprints.org preprint supplement (doi:10.20944/preprints201809.0428.v1), 2018-09-21
Supplement: Supplementary file 1 [file supplementary]

Archive with 3 entries (3 files):
- Supplementary figure 1.pdf
- Supplementary table 1.xlsx
- Supplementary table 2.xlsx
