# Supplementary material for: Inter- and Intra-Host Nucleotide Variations in Hepatitis A Virus in Culture and Clinical Samples Detected by Next-Generation Sequencing<strong> </strong>
Source: Preprints.org preprint supplement (doi:10.20944/preprints201809.0428.v1), 2018-09-21
Supplement: Supplementary file 1 [file supplementary]

## Sheet: Freq
Supplementary table 2: summary of F4-c1 variants from multiple timepoints against 62 dpi _NGS:
				(120 dpi)		(180 dpi)		(240 dpi)		(335 dpi)		(417 dpi)		(500 dpi)		(600 dpi)		(800 dpi)		(996 dpi)		(1200 dpi)		predicted SNVs #	AAA45465.1
Reference Position	Type	Reference	Allele	Cvrg. *	Freq. **	Cvrg. *	Freq. **	Cvrg. *	Freq. **	Cvrg. *	Freq. **	Cvrg. *	Freq. **	Cvrg. *	Freq. **	Cvrg. *	Freq. **	Cvrg. *	Freq. **	Cvrg. *	Freq. **	Cvrg. *	Freq. **	(highlighted in blue)	Amino acid change
15	SNV	T	C					-	-	-	-									625	46.08	630	57.1429	15T>C	non-coding
26	SNV	T	C					-	-	-	-							542	65.8672	668	24.5509	682	40.176	26T>C	non-coding
91	SNV	T	G																	748	35.4278			91T>G	non-coding
115	SNV	C	T	225	10.6667	112	28.5714	-	-	-	-														non-coding
122	Insertion	-	TTTG	-	-	98	13.2653	-	-	-	-														non-coding
127	SNV	C	T	225	11.5556	105	21	412	70.8738	-	-			278	17.2662	308	63.3117	301	99.6678	548	41.4234	594	62.6263	127C>T	non-coding
127	SNV	C	G																	548	26.2774	594	37.2054	127C>G	non-coding
127	Deletion	C	-																	548	32.2993				non-coding
139	SNV	A	G	253	89.3281	126	79.4	468	87.3932	258	98.4496	223	98.6547	298	99.3289	700	100	516	99.8062	619	99.6769	603	100	139A>G	non-coding
190	Deletion	T	-	318	86.7925	151	80.8	550	84.5455	289	95.1557	231	97.4026	325	96	985	97.0558	624	94.8718	841	95.8383	824	95.1456	190deletionT	non-coding
548	SNV	T	C					434	11.7512	224	61.1607	226	96.9026	270	99.6296	824	99.7573	502	99.8008	644	99.8447	770	99.7403	548T>C	non-coding
578	SNV	A	G	214	81.3084	109	70.6	322	82.6087	171	84.7953	136	86.7647	186	87.6344	582	87.1134	306	84.3137	425	81.1765	518	84.556	578A>G	non-coding
578	Deletion	A	-							171	11.6959							306	10.7843						non-coding
633	SNV	G	A	148	87.1622	102	82.4	326	86.5031	129	100	115	98.2609	151	99.3377	456	99.7807	282	100	321	99.6885	426	99.5305	633G>A	non-coding
674	SNV	T	G	188	89.3617	121	76	409	87.0416	173	99.422	129	100	191	100	538	100	340	100	375	100	485	100	674T>G	non-coding
713	SNV	T	C	197	73.6041	142	66.2	433	86.1432	201	95.0249	140	73.5714	221	66.9683	585	56.5812	359	65.1811	392	16.0714	491	21.7923
779	SNV	C	T											256	13.2812	788	40.3553	446	93.0493	575	99.6522	670	100	779C>T
793	SNV	C	T													817	31.7014	484	58.2645	627	15.4705	736	21.875	793C>T
843	SNV	G	A															531	36.3465			884	20.5882	843G>A
844	SNV	T	A															531	29.7552	606	82.5083	769	75.0325	844T>A
858	SNV	C	T															470	39.3617	656	16.1585	790	23.038	858C>T
861	SNV	C	T																			784	15.4337	861C>T
951	SNV	G	A	-	-	151	12.6	-	-	-	-													951G>A
1099	Deletion	TGCAAGATT	-													634	16.877	343	34.9854					1099del
1107	SNV	T	A															343	10.2041					1107T>A
1185	SNV	A	G							136	25	101	29.703	152	14.4737	506	15.2174							1185A>G
1251	SNV	A	T							155	15.5													1251A>T
1292	SNV	G	A									172	13.3721	200	12.5									1292G>A
1296	SNV	C	T													531	27.1186	456	57.8947					1296C>T	Ala192Val
1300	SNV	C	T																	519	34.6821	516	21.7054	1300C>T
1348	SNV	T	C									186	10.7527	239	17.5732	599	51.0851	535	40.7477	626	87.0607	569	86.6432	1348T>C
1396	SNV	C	T							213	14.554													1396C>T
1408	SNV	T	C																			546	30.2198	1408T>C
1525	SNV	A	G															428	30.3738					1525A>G
1604	SNV	C	T									185	11.8919	225	14.6667	606	25.7426	496	59.879	623	25.5217	644	28.2609	1604C>T	His295Tyr
1649	SNV	C	T															528	11.1742					1649C>T
1764	SNV	C	T											167	20.3593	105	33.3333	301	38.206					1764C>T
2037	SNV	G	A															779	11.6816					2037G>A
2071	Deletion	TTG	-															619	16.3166					2071del
2101	SNV	C	T																	770	35.0649	812	24.8769	2101C>T
2261	SNV	G	A	342	84.2105	205	68.3	604	78.1457	253	99.6047	230	100	301	99.0033	1072	99.5336	627	99.8405	956	100	1019	99.8037	2261G>A	Val514Ile
2285	SNV	T	G																			1158	15.7167	2285T>G
2421	SNV	C	T									197	25.8883	244	23.7705	771	32.0363	451	54.7672			730	17.2603	2421C>T	Ser567Phe
2561	SNV	T	A															288	85.0694	909	100	808	100	2561T>A	Leu614Met
2737	SNV	C	T													556	10.6			744	33.0645	661	31.7701	2737C>T
2800	SNV	G	A	285	97.8947	181	93.9	482	95.4357	170	100	152	100	181	98.3425	435	99.3103	203	99.5074	593	98.8196	508	98.8189	2800G>A
2880	SNV	T	C															341	37.2434					2880T>C
2926	SNV	T	A							176	13.1	177	16.3842	211	15.1659									2926T>A
2956	SNV	A	G																			716	21.0894	2956A>G
2958	SNV	C	T															674	10.5341					2958C>T
3005	SNV	C	T	382	10.733	292	36.6	700	16.4286	-	-													3005C>T
3024	SNV	G	T							350	10													3024G>T
3109	SNV	C	T																	1226	25.367	1301	27.4404	3109C>T
3321	SNV	T	A																			1183	19.9493	3321T>A
3472	SNV	C	T																	829	40.2895	854	31.9672	3472C>T
3476	SNV	T	G					754	25.6	-	-			322	16.1491	924	38.7446	618	32.2007	800	80.625	820	80.4878	3476T>G
3598	SNV	A	C									260	19.2308	324	14.1975	753	44.7543	545	80.9174	700	60.8571	642	48.2866	3598A>C
3661	SNV	A	G					739	25.5751	-	-													3661A>G
3707	SNV	G	A																	234	28.6325	182	48.9011	3707G>A
3779	SNV	T	C															398	12.8141					3779T>C
3799	SNV	T	C																	122	60.6557	111	62.1622	3799T>C
3853	SNV	T	C																			251	23.1076	3853T>C
3873	SNV	A	T													338	48.2249	558	78.6738	373	48.7936	359	44.0111	3873A>T
3876	SNV	T	C	410	14.878	273	30	783	16.092	-	-													3876T>C
3932	SNV	A	T					755	30.0662	-	-													3932A>T
3937	SNV	C	T															804	18.0348					3937C>T
3965	SNV	A	C															803	26.8991	1046	89.1969	1032	76.938	3965A>C
3968	SNV	G	A															812	31.2808	1059	43.3428	1036	28.5714	3968G>A	Met1082Leu
3969	SNV	A	C																			1027	19.0847	3969A>C
3973	SNV	A	G															838	16.5871	1060	53.2075	1048	50.3817	3973A>G
4024	SNV	C	T																	778	43.0591	790	45.8228	4024C>T
4074	SNV	T	A	383	12.2715	272	30.1	699	15.1645	-	-							756	13.0952					4074T>A
4078	SNV	C	T	377	15.1194	268	22.7612	691	13.4588	-	-													4078C>T
4209	SNV	C	T	419	24.3437	264	40.1515	763	22.6737	-	-													4209C>T
4222	SNV	G	A					776	18.5567	-	-													4222G>A
4347	SNV	A	G																			1162	15.4905	4347A>G
4406	SNV	T	C																			1306	38.438	4406T>C
4522	SNV	T	A															904	15.9292	1165	47.6395	1272	47.1698	4522T>A
4538	SNV	A	T															853	24.5018					4538A>T
4570	SNV	T	C															816	12.1324	1098	46.8124	1192	42.7852	4570T>C
4648	SNV	C	T															766	17.2324	1220	16.4754			4648C>T
4730	SNV	G	A													990	16.0606							4730G>A
4737	SNV	T	C					990	30.202	350	71.1429	305	63.6066	366	59.2896	985	67.9188	768	76.0417	1042	69.7697	970	54.2268	4737T>C	Val1339Ala
4768	SNV	C	T													633	16.5877	625	20	673	44.2794	566	46.2897	4768C>T
4845	SNV	A	G													250	13.2	732	22.4044	356	33.7079	273	48.718	4845A>G
4969	SNV	C	T															1064	16.7293					4969C>T
5014	SNV	T	A															1008	11.6071	1249	31.8655	1207	18.3099	5014T>A
5014	SNV	T	G																			1207	22.3695	5014T>G
5032	SNV	C	T													1313	13.7852							5032C>T
5061	SNV	A	G									474	10.3376											5061A>G
5063	SNV	T	C									480	13.3333	589	21.0526	1510	12.5828	1005	10.7463	1292	31.3468	1296	50.5401	5063T>C
5132	SNV	A	G	538	78.0669	408	55.1471	1120	70.5357	405	99.2593	389	99.4859	430	99.7674	1319	99.6967	763	100	1137	99.8241	1135	100	5132A>G
5146	SNV	C	T									407	14.2506	455	10.989									5146C>T
5180	SNV	C	A																			1323	23.9607	5180C>A
5219	SNV	T	C	671	26.6766	463	47.0842	1312	30.0305	-	-													5219T>C
5242	SNV	A	T									349	49.8567	451	86.2528	1289	97.9053	780	100	1124	99.8221	1133	99.647	5242A>T	Gln1507His
5266	SNV	A	G															812	17.3645	1119	35.1206			5266A>G
5537	SNV	C	T																			881	16.5721	5537C>T
5584	SNV	T	C	648	74.3827	527	57.1157	1273	71.0134	428	98.3645	423	99.5272	509	100	1364	99.7067	980	99.5918	1272	99.6069	1299	99.5381	5584T>C
5597	SNV	G	A													1495	20.0669	990	42.5252	1349	53.8176	1378	56.1684	5597G>A	Gly1626Arg
5744	SNV	A	G															986	20.5882	1397	47.5304	1503	43.3134	5744A>G
5839	SNV	C	T															824	13.7136					5839C>T
5966	SNV	T	A																	594	36.1953	514	55.2529	5966T>A
6011	SNV	T	C	758	74.0106	544	57.9044	1369	74.7261	444	100	387	99.7416	468	100	654	100	851	99.765	687	99.8544	564	99.8227	6011T>C	Tyr1764His
6058	SNV	C	T							561	10.5169	514	21.4008	615	18.374	711	10.1266	1044	21.3602	705	28.7943	534	46.2547	6058C>T
6103	SNV	G	A															923	22.6436					6103G>A
6134	SNV	A	G	728	98.0769	614	99.8371	1388	99.0634	526	97.9087	443	97.2912	558	98.7455	519	100	869	100	492	99.5935	452	99.5575	6134A>G
6313	SNV	T	C									637	19.4662	708	35.3107	2019	77.8108	1275	88.9412	1678	58.5816	1638	45.1771	6313T>C
6372	SNV	T	C																			1202	39.6007	6372T>C
6376	SNV	C	T									472	17.7966	542	17.3432									6376C>T
6520	SNV	C	T															1601	15.0531					6520C>T
6670	SNV	C	T															900	12.7778					6670C>T
6823	SNV	C	T	886	18.5102	762	23.7533	1589	18.2505	-	-													6823C>T
6955	SNV	T	C	946	16.2791	822	50.7299	1889	72.9487	676	49.4083	571	88.6165	644	96.118	404	100	789	99.8733	365	100	276	99.6377	6955T>C
6967	SNV	A	G	-	-	899	12.0134	-	-	-	-													6967A>G
7028	Insertion	-	C	1024	14.1602	934	13.5974	2071	14.6789	779	14.249	705	12.6241	756	12.4339	831	11.5524	1124	15.3915	773	15.6533			7028ins
7028	SNV	A	C	1020	81.8627	938	83.5821	2071	82.5205	781	83.7388	710	85.3521	757	85.6011	840	86.3095	1133	82.083	779	83.0552	547	84.4607	7028A>C
7039	SNV	A	G	1108	13.8989	-	-	-	-	-	-													7039A>G
7285	SNV	G	A	1163	57.4377	1114	48.0251	2554	62.6077	646	97.9876	651	98.9247	694	98.8473	607	98.682	845	99.4083	540	99.0741	374	98.9305	7285G>A
7291	SNV	T	C					2558	10.9851	-	-	663	38.4615	703	67.9943	609	90.4762	853	55.4513	541	41.7745	373	36.7292	7291T>C
7295	SNV	T	C							663	34.54							856	42.2897	541	57.671	373	63.2708	7295T>C
7378	SNV	C	T															372	73.1183	122	100	87	100	7378C>T
7393	SNV	T	G									284	22.1831	323	15.7895			226	63.2743	42	100	47	100	7393T>G	Cys2224Trp
7417	SNV	A	G	182	76.3736	166	69.8795	375	84	131	100	167	100	197	100	51	100	158	100	22	100	34	100	7417A>G
		SNVs with frequencies >70% highlighted in green
		SNVs with frequencies between 35-70% highlighted in yellow
		# Based on the NGS frequency, a SNV was predicted to be confirmed by pyrosequencing as a real one (either homozygous or heterozygous): in total 62 predicted SNVs, 50 are in coding region, and 12 are in non-coding region.
		* Cvrg: depth of NGS coverage at that nucleotide position.
		** Freq: variation frequency.
