# Supplementary material for: Inter- and Intra-Host Nucleotide Variations in Hepatitis A Virus in Culture and Clinical Samples Detected by Next-Generation Sequencing<strong> </strong>
Source: Preprints.org preprint supplement (doi:10.20944/preprints201809.0428.v1), 2018-09-21
Supplement: Supplementary file 1 [file supplementary › Supplementary figure 1.pdf]

Entry: 1742  
 Sample: HM175  
 Position 1: C/T (Passed) \*

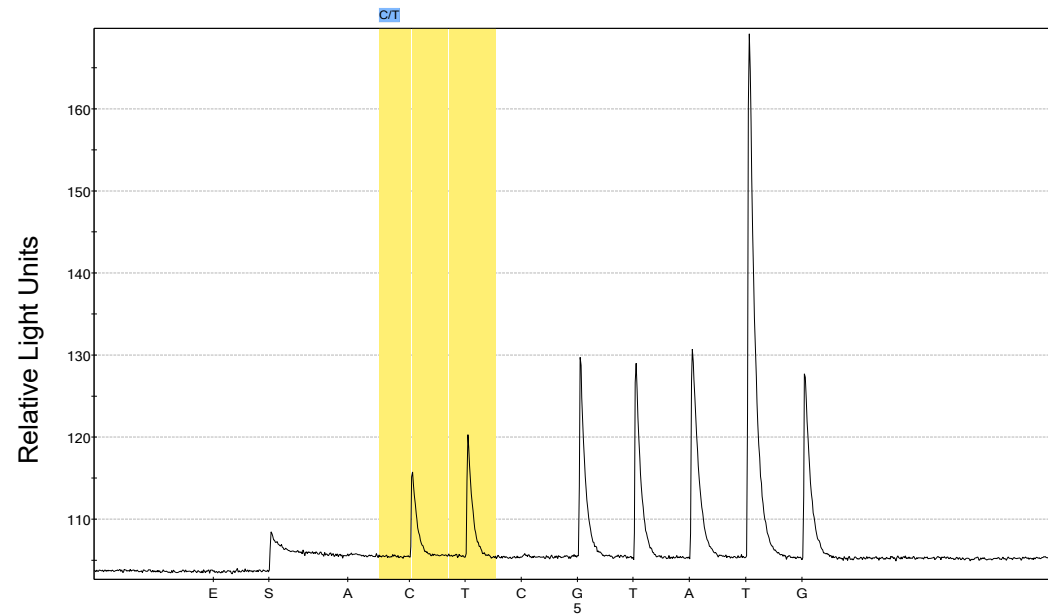

Entry: 6836  
 Sample: HM175  
 Position 1: C/T (Passed)

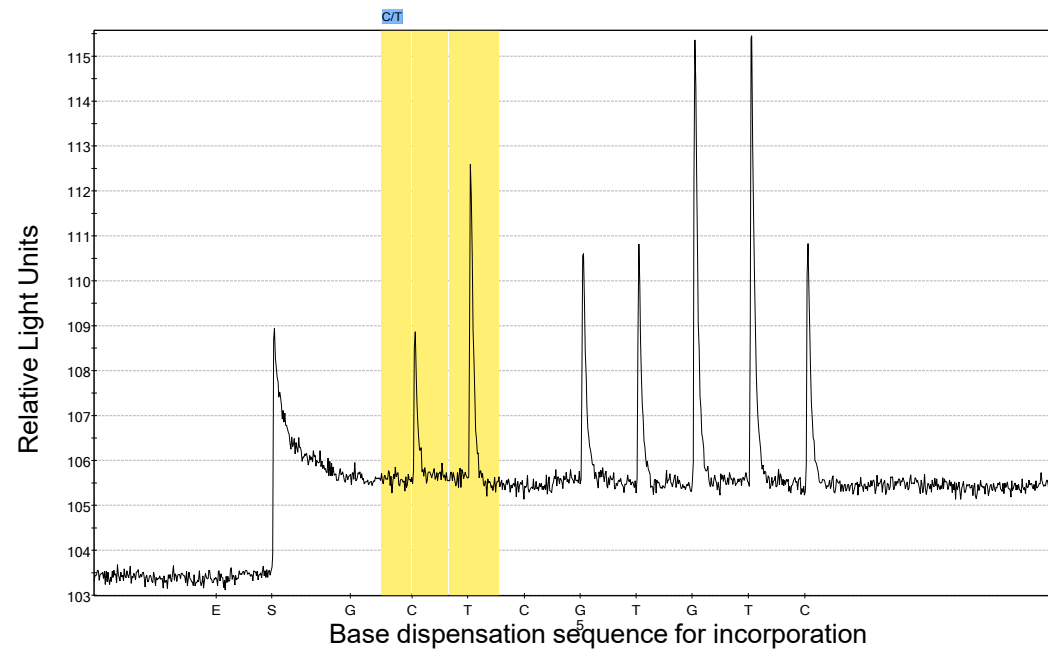

**Supplemental Figure 1. The representative pyrograms of the heterozygosity in the clinical stool samples.** Two SNVs at nucleotide positions 1742 and 6836 identified by NGS were confirmed by pyrosequencing (Table 1). The representative pyrograms of the substitution G to A at nucleotide position 1742 (\*shown as C to T, due to the antisense primer applied for this SNV), and C to T at nucleotide position 6836 compared to the reference sequence (NCBI accession number: M14707) are shown. The pyrosequencing method is described under Material and Methods. E = addition of enzyme, S = addition of substrate.
