# Supplementary material for: Inter- and Intra-Host Nucleotide Variations in Hepatitis A Virus in Culture and Clinical Samples Detected by Next-Generation Sequencing<strong> </strong>
Source: Preprints.org preprint supplement (doi:10.20944/preprints201809.0428.v1), 2018-09-21
Supplement: Supplementary file 1 [file supplementary › Supplementary table 1.xlsx]

## Sheet: original primers
Supplementary table 1a: initial PCR primers for amplicons
		Region	Reference	Allele		PCR (region of interest)
					PCR #	Region
segment	SNV		CNVs for M16632-clone1:				Primer Name	Sequence
1)	1	124	C	T	1)	48-394 (347 bp)	C1 (48-394)_F	TGGTGAGGGGACTTGATACC
							C1 (48-394)_R	GCCTACCCCTTGTGGAAGAT
2)	2	599	T	C		391-921	C1 (391-921)_F	AGGCTACGGGTGAAACCTCT
	3	641	G	A			C1 (391-921)_R	TTCAACCTGGTGTGATCCAA
	4	721	T	C
3)	5	959	G	A		795-1193	C1 (795-1193)_F	GGCAGACATTGAGGAAGAGC
						(398 bp)	C1 (795-1193)_R	TCACCAGGAACCATAGCACA
4)	6	2269	G	A		(2106-2580)	C1 (2106-2580)_F	TAACGTTGCTTCCCATGTCA
						(474 bp)	C1 (2106-2580)_R	TGTTGATGGCAAACCATGAG
5)						2975-3395	C1 (2975-3395)_F	ATTTTCCCAGAGCTCCATTG
	7	3022	T	A			C1 (2975-3395)_R	CCAGTAAGAACCCCAGCATC
6)	8	3484	T	A or G		3198-3599	C1 (3198-3599)_F	ACTTCCACCCCCTAGGAAAA
						(401 bp)	C1 (3198-3599)_R	AACCAATGCAGCAAGAAACA
7)	9	3669	A	G		3572-4039	C1 (3572-4039)_F	CGGATTTGTGTTTCTTGCTG
	10	3884	T	C			C1 (3572-4039)_R	TGAAAATGGTGATCCCAGAA
8)	11	4086	C	T			C1 (3952-4501)_F	TGGCAAATGGACTCCAGAAT
	12	4217	C	T		3952-4501	C1 (3952-4501)_R	TCTTTTCAGGCTCAACACCA
	13	4230	G	A
	14	4413	A	T
9)						4520-4667 (148 bp)	C1 (4520-4667)_F	TGGCTTCAGATTACTGGGATG
	15	4638	A	T			C1 (4520-4667)_R	TCCTCAAGAGAGGCCATGTT
10)	16	5140	A	G		4907-5343	C1 (4907-5343)_F	TTTCATTGATGGATTTGCTCA
							C1 (4907-5343)_R	TCCAACTCCAAACTGAACCA
11)	17	5592	T	C		5521-5697 (176 bps)	C1 (5521-5697)_F	GATGTGGGATTCCAGGATGT
							C1 (5521-5697)_R	CATCTTTAGTGGGCCCTCAG
12)	18	6142	A	G		6053-6589	C1 (6053-6589)_F	CTGCAGCTATGCCCTTTTCT
							C1 (6053-6589)_R	CACCTGTATGGAAACCTGGA
13)	19	6831	C	T		6516-6970	C1 (6516-6970)_F	CACAATTTTGTGCCGAATGT
	20	6903	T	C			C1 (6516-6970)_R	AACAGAGAATCTTCAAAGCCTGA
14)	21	6963	T	C		6914-7467	C1 (6914-7467)_F	CCAAGATATTTGGAAAGTCTCCAGT
	22	6975	A	G			C1 (6914-7467)_R	TGATAAAAGAAATAAACAAACCTCAGA
	23	7293	G	A
	24	7425	G	A
15)	1	4738	G	Z		4584-4932	WT(4584-4932)_F	GGCCAAAACACAACAGATGA
	2	4745	T	C		(348 bp)	WT(4584-4932)_R	TGAGCAAATCCATCAATGAAA
	3	4752	A	G
16)	4	5740	A	T			WT(5609-6108)_F	AGGGGATGTGCCTAGAGCTT
	5	5781	C	T		5609-6108	WT(5609-6108)_R	ACATCACAGCCATTGGATCA
	6	6019	T	C		(499 bp)
seg	snp	Region	Reference	Allele		PCR (region of interest)
			CNVs for M14707-wt:			Region	Primer Name	Sequence
17)	1	1742	G	A		1641-1999	WT(1641-1999)_F	ccaactttggctgctcagtt
							WT(1641-1999)_R	gaaatccagggaacacgaaa
18)	2	2864	T	A		2675-3000	WT(2675-3000)_F	GCCTGGTTCACTCCAGTAGG
							WT(2675-3000)_R	TCAATGGAGCTCTGGGAAAA
19)	3	4185	G	A		3957-4403	WT(3957-4403)_F	TGGCAAATGGACTCCAGAAT
							WT(3957-4403)_R	TGGCTCACATCTCGTTACCA
20)	4	5204	G	A		5157-5545	WT(5157-5545)_F	CTCGTTGGAGGATGGTTTGT
							WT(5157-5545)_R	ACATCCTGGAATCCCACATC
21)	5	6216	T	C		6089-6554	WT(6089-6554)_F	TGATCCAATGGCTGTGATGT
	6	6522	T	A			WT(6089-6554)_R	AGCTGGACCCCAATACATTC
22)	7	6836	C	T		6750-7192	WT(6750-7192)_F	TCTGGAACTCCATCCCATTT
	8	7042	-	Insert A			WT(6750-7192)_R	TTTTCCGAAATTGCAGGTCT

## Sheet: Sequencing primers
Supplementary table 1b: sequencing primers used in this study
				For M16632-clone 1:
PCR#	Segment	SNV	pos	ref	snv	primer name	primer seq	seq to analyze
1	1-1	1	124	C	T	124UF	AGCGCTGCTCCGGTTCATAGATTTTGATACCTCACCGCCGTTT	A/GGGAAAGG GAAAAGGGAA
						124R	GACAGAAAGCGTGAAAATGAGTG
						124S	ACAAGCAAAAGGGAAT
2	2	2	599	T	C	599F	TAGGGTAACAGCGGCGGATAT	CAT/CTTGGC CTTAAATGGG
						599UR	AGCGCTGCTCCGGTTCATAGATTTCCCCTCTCACAGAATCCCATTTA
						599S	GTGCTTAGGGCAAACAT
		3	641	G	A	641UF	AGCGCTGCTCCGGTTCATAGATTTGGCCTTAAATGGGATTCTG	GTC/TAATGG AGGGATCCCC
						641R	ATCATTTGCTCTTCCTCAATGTCT
						641S	CAAAGAACAGTCCAGCT
		4	721	T	C	721F	AGGTACTCAGGGGCATTTAGGTT	TT/CAAATAA TAATGAACAT
						721UR	AGCGCTGCTCCGGTTCATAGATTCACTCCCAACAGTCTGGAAAAT
						721S	TTTAGGTTTTTCCTCATTC
3	3	5	959	G	A	959F	ATACAGCTGAGGTTGGATCACA	GAG/AGACTC AGGGAGAGAA
						959UR	AGCGCTGCTCCGGTTCATAGATTTGGAAAAGAGCATGTGTAGTAAGC
						959S	TAAACCCGGTTCAAA
4	4	6	2269	G	A	2269UF	AGCGCTGCTCCGGTTCATAGATTTGTTTTGCTCCTCTTTATCATGC	CAAC/TTTGG GGATCTGGAA
						2269R	AAACATCCATTTTCCCTCTGTTAG
						2269S	ATCTTTCATGGTTGTTATAC
5	5	7	3022	T	A	3022F	TTTTCCCAGAGCTCCATTGAACT	GTAT/ACAAT GATGAGCAGA
						3022UR	AGCGCTGCTCCGGTTCATAGATTTCCAGCTGCAATTCTGCTCAT
						3022S	ATGCCATGTTATCCACT
6	6	8	3484	T	A or G	3484F	GAGCTTTAAGGAGGTTTGGATTCT	AAT/A/GATT GGTCCAAAGT
						3484UR	AGCGCTGCTCCGGTTCATAGATTTCAAGATCCAACATCCCATGTG
						3484S	TGAAAAGTTTACAAGTAACA
7	7	9	3669	A	G	3669UF	AGCGCTGCTCCGGTTCATAGATTGCAGATAGAATGCTTGGATTGTC	C/TTGTTCTT TAATTTCCTG
						3669R	GGCACATGAAATAACTGAACAACC
						3669S	TGCTATTAATCCAACACC
		10	3884	T	C	3884UF	AGCGCTGCTCCGGTTCATAGATTGTTTGGATTTCATCATTCTGTGAC	TA/GCATAAT TCATGACTCT
						3884R	TTAAAGACTGTTTCCAGCATTTTG
						3884S	ATAACTGAACAACCAATATC
8	8	11	4086	C	T	4086UF	AGCGCTGCTCCGGTTCATAGATTCAAGGATGCAATTTATTGGCTTTA	A/GTCCATTA ATTTTGTATA
						4086R	TCCTTCTTCTTGCCATAATTCAC
						4086S	CCATAATTCACTTCATAAAA
		12	4217	C	T	4217F	ATTATGGCAAGAAGAAGGACATTT	ATC/TTGAAC AGTATCA
						4217UR	AGCGCTGCTCCGGTTCATAGATTGAGCCATTGAATGAACAGTTCTC
						4217S	ATCCAAGATGTGGAAAA
		13	4230	G	A	4230UF	AGCGCTGCTCCGGTTCATAGATTAAAAATAGAGAAAGCCATTGAGGA	TTC/TTGATA CTGTTCA
						4230R	TCTCGTTACCATTGCCTGATTT
						4230S	TGTATCAAGTCAACCCCT
		14	4413	A	T	4413F	GAGATGTGAGCCAGTTGTTTGT	TA/TTATGGC AAAAGAGGGG
						4413UR	AGCGCTGCTCCGGTTCATAGATTTCTTTTCAGGCTCAACACCA
9	9					4413S	GAGCCAGTTGTTTGTTATT
		15	4638	A	T	4638UF	AGCGCTGCTCCGGTTCATAGATTGGCCAAAACACAACAGATGA	ATA/TGGACA TCCTGACACT
						4638R	AGAGAGGCCATGTTTAATCTCA
						4638S	AGGCCATGTTTAATCTC
10	10	16	5140	A	G	5140UF	AGCGCTGCTCCGGTTCATAGATTGCTGTGGGAGCTGCAGTTG	AC/TGCCAAC TGCAGCTCCC
						5140R	CCATAATATACCCCTTCAGCTGG
						5140S	AACGAGCACTCCAAGA
11	11	17	5592	T	C	5592UF	AGCGCTGCTCCGGTTCATAGATTTGTTCTGATGAAGGTTCCTACAA	AA/GTGCTGA GTAATATCTC
						5592R	CCAGGCGATTCAAAGCTCTA
						5592S	ACATCCCCTTTCTTAATAA
12	12	18	6142	A	G	6142F	ATGCCCTTTTCTAAAGCTGAAAT	GA/GATTATA AAGAGGCTTC
						6142UR	AGCGCTGCTCCGGTTCATAGATTTGGTCAACTTCTCCTGGACATAA
						6142S	CCTATTGTAGAAGAACCAGA
13	13	19	6831	C	T	6831F	TCTGGAACTCCATCCCATTTTG	C/TTGTGGTT CAATGCCCTC
						6831UR	AGCGCTGCTCCGGTTCATAGATTACCCAGAGGGCATTGAACCA
						6831S	TATAACTGTTGTTACCATGT
		20	6903	T	C	6903UF	AGCGCTGCTCCGGTTCATAGATTCCATTTTGGCACAGCTCTTAT	ATAA/GTACA AATTGACATT
						6903R	GAGAATCTTCAAAGCCTGACAAA
						6903S	CAAATATCTTGGAAAACAC
14	14	21	6963	T	C	6963F	GATATTTGGAAAGTCTCCAGTTTT	GATT/CCTCT GTTATGG
						6963UR	AGCGCTGCTCCGGTTCATAGATTAAGTAGCTGTCATGCCAAGTTTCT
						6963S	TTTGTCAGGCTTTGAA
		22	6975	A	G	6975UF	AGCGCTGCTCCGGTTCATAGATTTTCTTTTGTCAGGCTTTGAAGAT	TCC/TCCATA ACAGAG
						6975R	CGTTACTTCTCTGCCATGCTATT
						6975S	AGAAAACTATTAAAACATCA
		23	7293	G	A	7293F	ATGGCAGAGAAGTAACGCTGAGT	AG/AAAATTT TATTATTTTG
						7293UR	AGCGCTGCTCCGGTTCATAGATTCTCCAAACAGGACTGAACAAAATA
						7293S	GCATGGCTATGAGTTTTATC
		24	7425	G	A	7425F	TTGGTGGAGAATGAGATTTTATGA	AACG/AAATT TTCTTAAAAT
						7425UR	AGCGCTGCTCCGGTTCATAGATTAAACAAACCTCAGAAATTTTAAGA
						7425S	GACCTTTCATGATTTGTTTA
15	2-1	1	4738	G	Z	4738F	TGAGGAGAAGGGTAGGCATTTT	G/A/C/TTTT ATGT/CTAAG GA
						4738UR	AGCGCTGCTCCGGTTCATAGATTAAATGGAGTCTGCGGTCAAT
						4738S	TCCAAGTCCAAAAACA
		2	4745	T	C			<included in 4738 and 4752 assay>
		3	4752	A	G	4752UF	AGCGCTGCTCCGGTTCATAGATTGATTAAACATGGCCTCTCTTGAG	TGCC/TTCCT TAA/GCATAA A
						4752R	GAAATGGAGTCTGCGGTCAAT
						4752S	GGAGTCTGCGGTCAAT
16	2	4	5740	A	T	5740F	GGCCCACTAAAGATGGAAGAGA	CTGA/TTGTA CCATCATTTT
						5740UR	AGCGCTGCTCCGGTTCATAGATTCTCCATGCCTGATCCACAGTTA
						5740S	TGATCCACAGTTAAATCAA
		5	5781	C	T	5781UF	AGCGCTGCTCCGGTTCATAGATTTAACTGTGGATCAGGCATGGAGAG	TTCA/GCCTT TTCCTCTCCA
						5781R	AGCAACATGGATGCCCAAGAT
						5781S	CACATTCCAGGAAGACC
		6	6019	T	C	6019F	TGTTGCAAAATTGGTTACTCAAG	TT/CATCATC ACATTGATAA
						6019UR	AGCGCTGCTCCGGTTCATAGATTGCATAGCTGCAGGAAAATTAATC
						6019S	TTTTTAGAAAGAGTCCCAT
				For M14707-WT:
17	3-1	1	1742	G	A	1742UF	AGCGCTGCTCCGGTTCATAGATTTGACCCATATTTTTTCCAAATGA	C/TGTATTTG TCATTTGGAA
						1742R	GGTGGGAAAAACTTGAAAATCA
						1742S	CATTTTTGGTCAGGATT
18	2	2	2864	T	A	2864F	TGGAGCTGTCAGATTTAACACAA	T/AGACAAGA CAGATTCTAC
						2864UR	AGCGCTGCTCCGGTTCATAGATTGGAGCTCTGGGAAAATAAAACTCT
						2864S	ACTGGATGGTTTGGG
19	3	3	4185	G	A	4185F	AGTGAATTATGGCAAGAAGAAGGA	G/AAATTTTG CATTTTGCAA
						4185UR	AGCGCTGCTCCGGTTCATAGATTCCCCTTTCTGATACTGTTCAAATT
						4185S	ATTGAGGAAGCCGAT
20	4	4	5204	G	A	5204UF	AGCGCTGCTCCGGTTCATAGATTTAAGCATTTCTCCCGCAAAG	C/TTCCTCTT TGCGGGAGAA
						5204R	TTTAATCACTTGCTTGGGCTTAG
						5204S	AGCTGGGATTGGTTC
21	5	5	6216	T	C	6216F	CAGAGGATTATAAAGAGGCTTCAA	TT/CTAGATC TTGATATGGC
						6216UR	AGCGCTGCTCCGGTTCATAGATTGGAGATGAATCCATGTTGATAGC
						6216S	ACTCAGTTAGTTGATGATTT
		6	6522	T	A	6522UF	AGCGCTGCTCCGGTTCATAGATTCTGTCCAAAAGATGAATTGAGACC	TTGA/TGTAA TCCAGAGGAC
						6522R	ACCCCAATACATTCGGCACA
						6522S	ACATTCGGCACAAAA
22	6	7	6836	C	T	6836F	CTGGAACTCCATCCCATTTTG	C/TTGTGGTT CAATGCCCTC
						6836UR	AGCGCTGCTCCGGTTCATAGATTAAGCTGTACAAGGAGACCCAGAGG
						6836S	TATAACTGTTGTTACCATGT
		8	7042	-	Insert A	7042UF	AGCGCTGCTCCGGTTCATAGATTCTTTTGTCAGGCTTTGAAGATTC	T[T]GTCCAA TCAAATCAAG
						7042R	AAAGTCAATTCCGAAACTGGTT
						7042S	AAACTCATCTACAATTTTT
				Biotin-labled universal primer:			5'- Biotin- GCT GCT CCG GTT CAT AGA TT -3'
